# Supplementary material
Source: PubMed Central journal article supplement (PMC9924869)
Supplement: 41573_2022_633_MOESM1_ESM.pdf [file 41573_2022_633_MOESM1_ESM.pdf]

---

# The evolving role of investigative toxicology in the pharmaceutical industry

---

In the format provided by the authors and unedited

## Investigative Toxicology Leader Forum 2020 survey

This 2020 survey, following the one of 2015, was conducted by the authors of this publication within their respective 14 mid-to-large size pharmaceutical companies. Further details are provided in Box 1 of the article.

Depending on the questions, replies were either categorical (e.g., yes or no) or actual number (e.g., percentages) or subjective appreciations about the topic being surveyed, in which case, the data were usually averaged where possible. The questions are stated in the title of each graph.

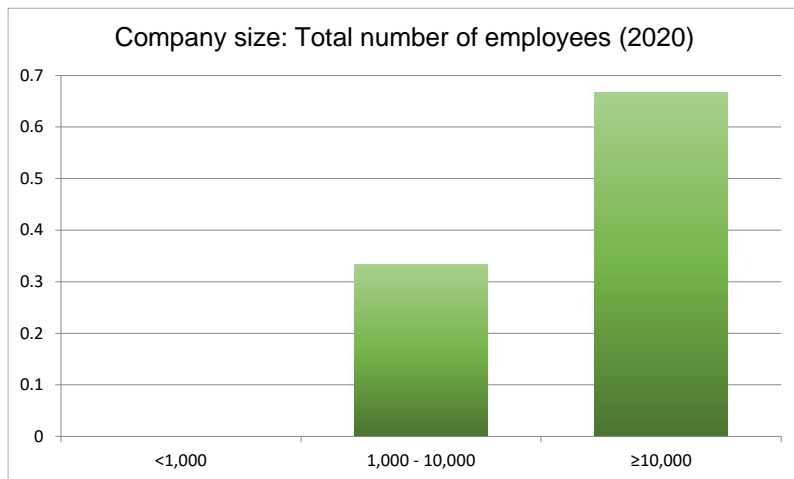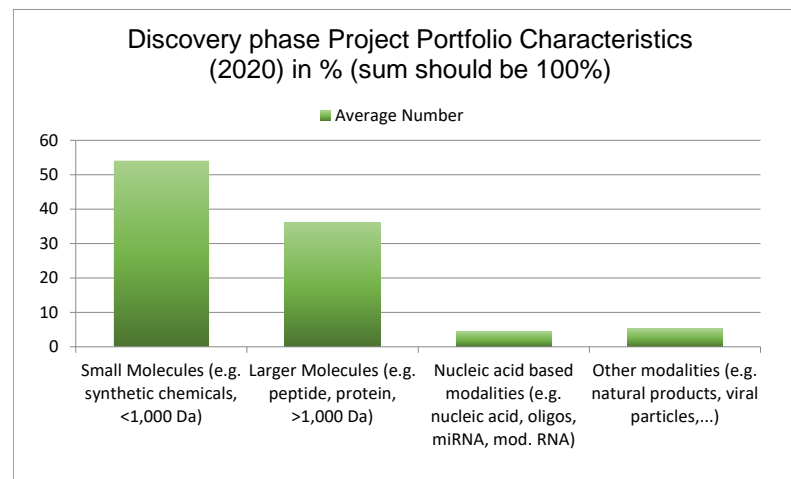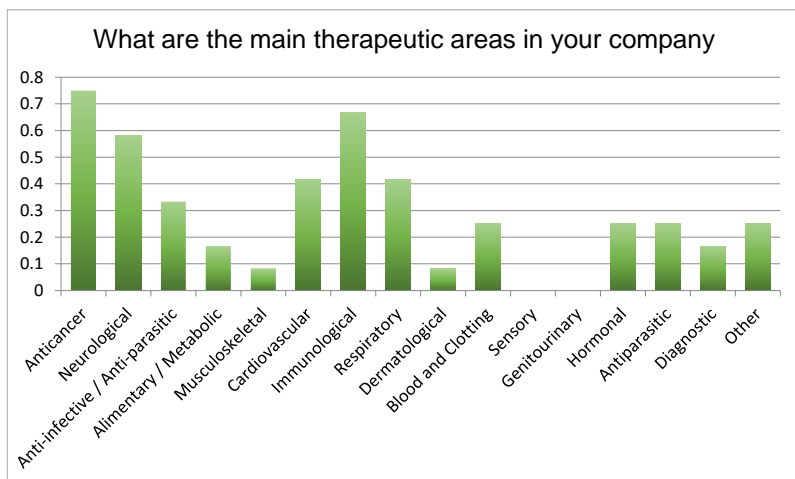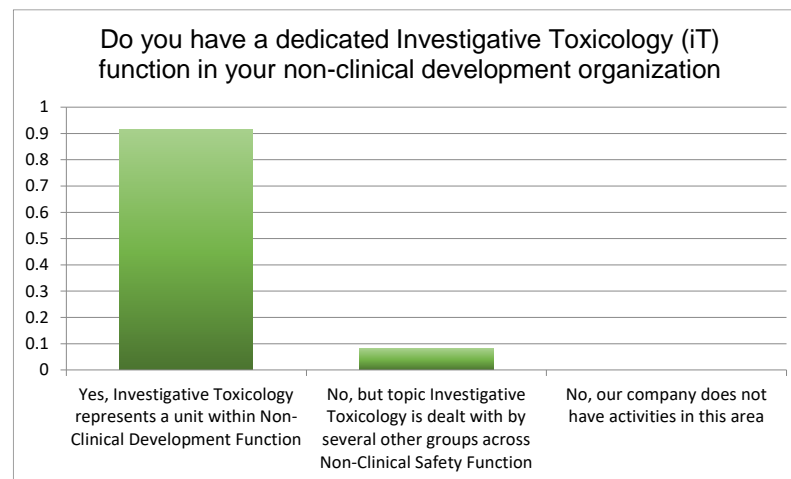

Size of Investigative Toxicology compared to Overall Non-Clinical Development & R&D in %

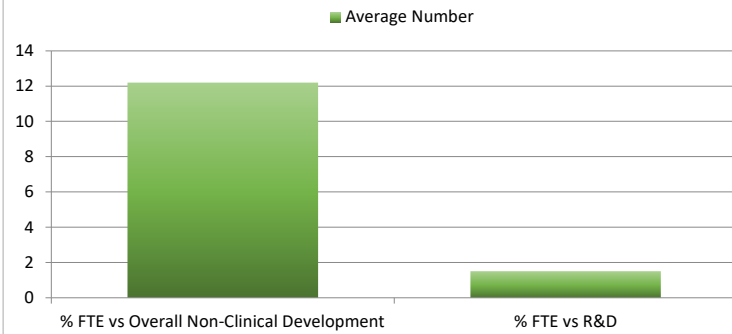

Where are the wet lab based activities of Investigative Toxicology conducted (in %)

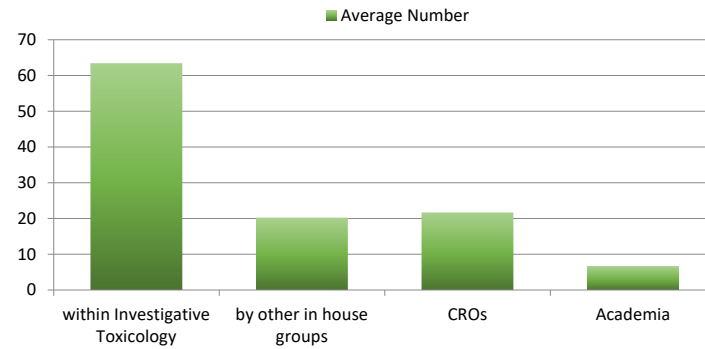

What is the overall academic profile of your Investigative Toxicology group as a % of the overall group size

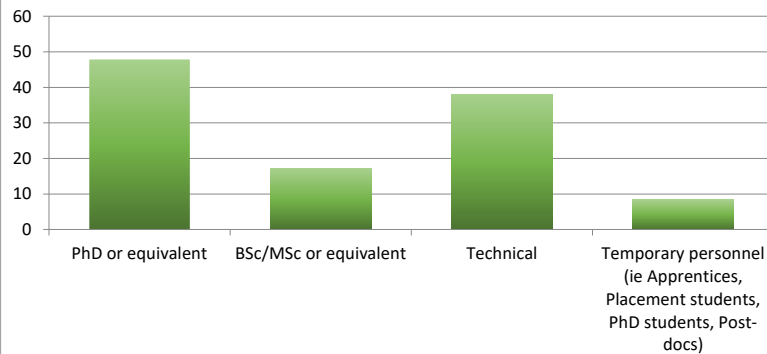

How is the distribution of Investigative Toxicology work (estimate of % of total annual spending) that is conducted under GLP, non-GLP, other QA procedures

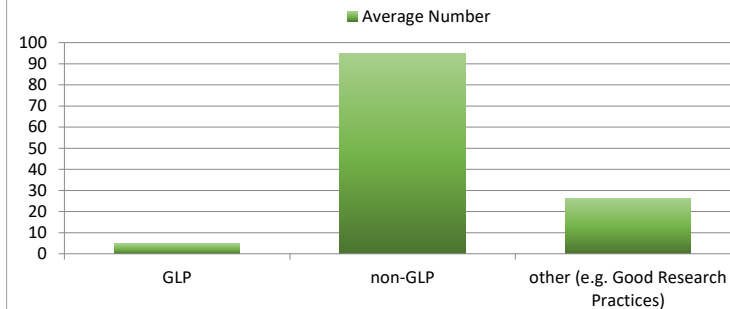

How is the budget distribution of Investigative Toxicology activities performed in house vs externally (%)

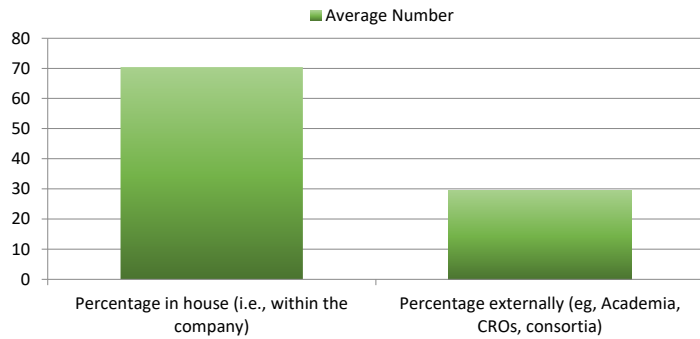

What is the percentage of FTEs' time dedicated to non-project related to innovation versus project support

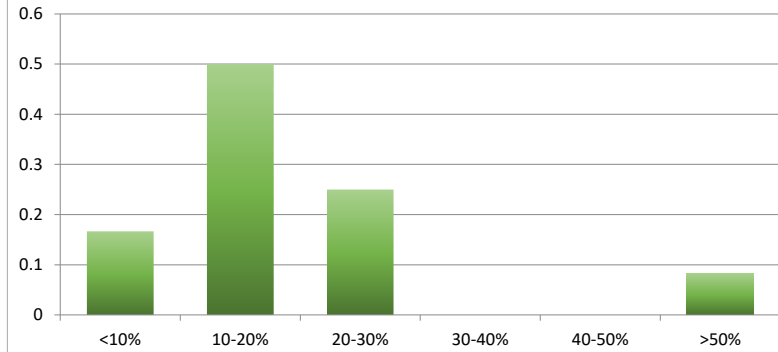

What are the core scientific competencies available in your Investigative Toxicology group

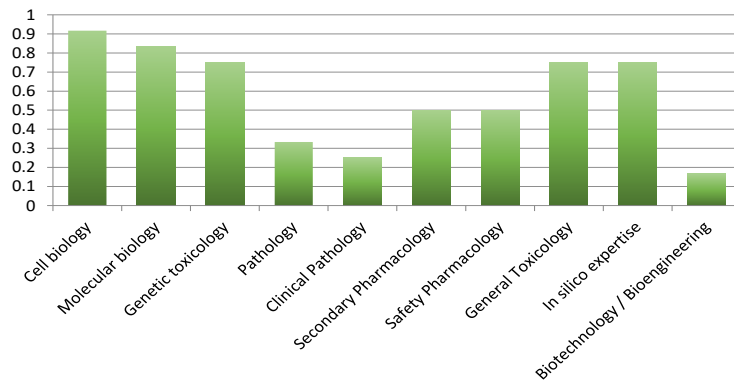

Core activities of Investigative Toxicology

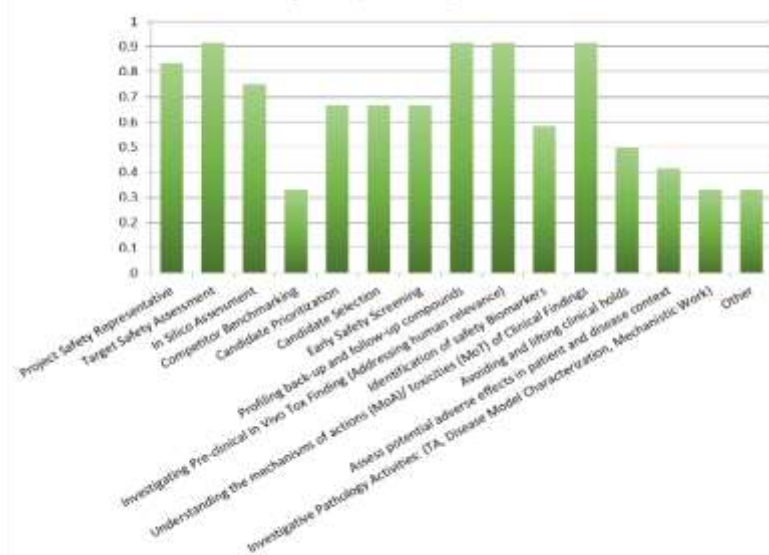

What are the core objectives of your Investigative Toxicology at Target Identification Stage (Entry into Portfolio)

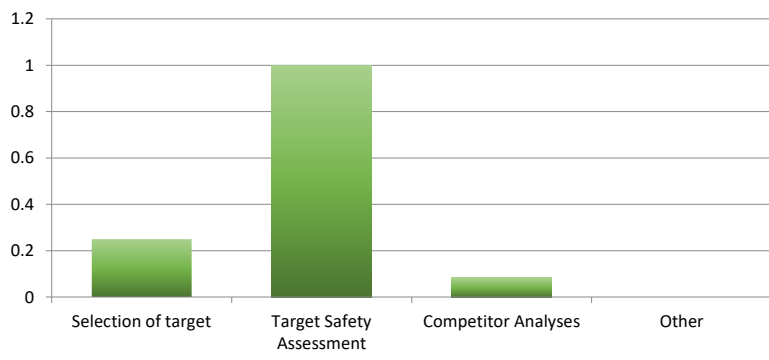

What are the core objectives of your Investigative Toxicology at Hit Identification Stage

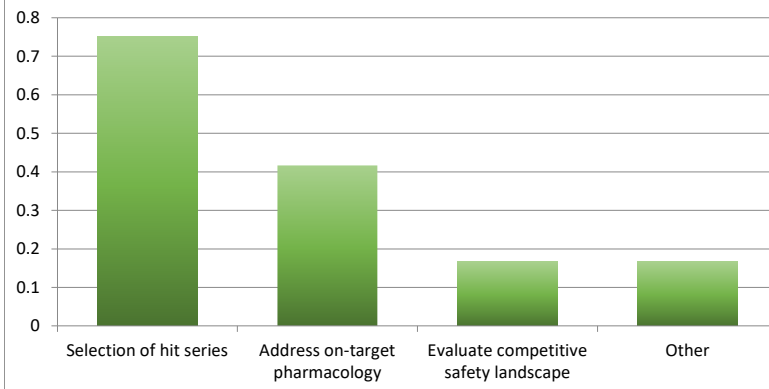

What are the core objectives of investigative Toxicology at Lead Optimisation Stage

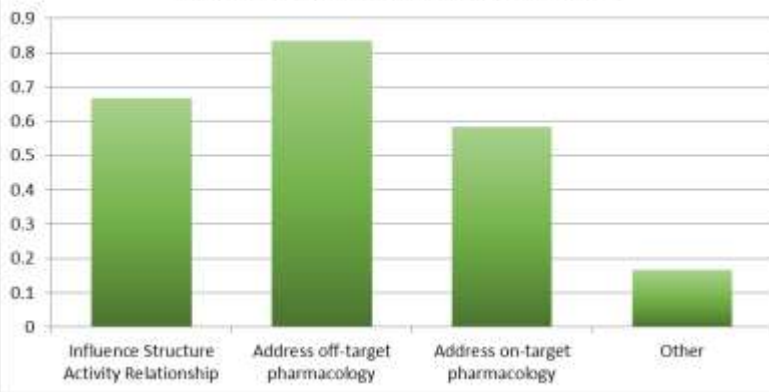

What are the core objectives of your Investigative Toxicology at Pre-clinical development stage (First In Vivo Studies up to FIH)

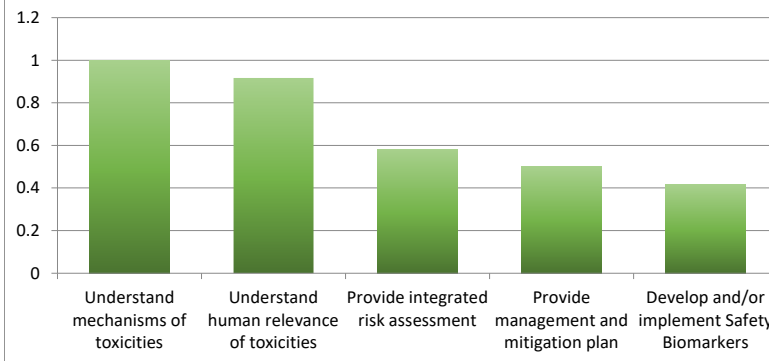

### What are the core objectives of your Investigative Toxicology at Entry into Human (EIH)

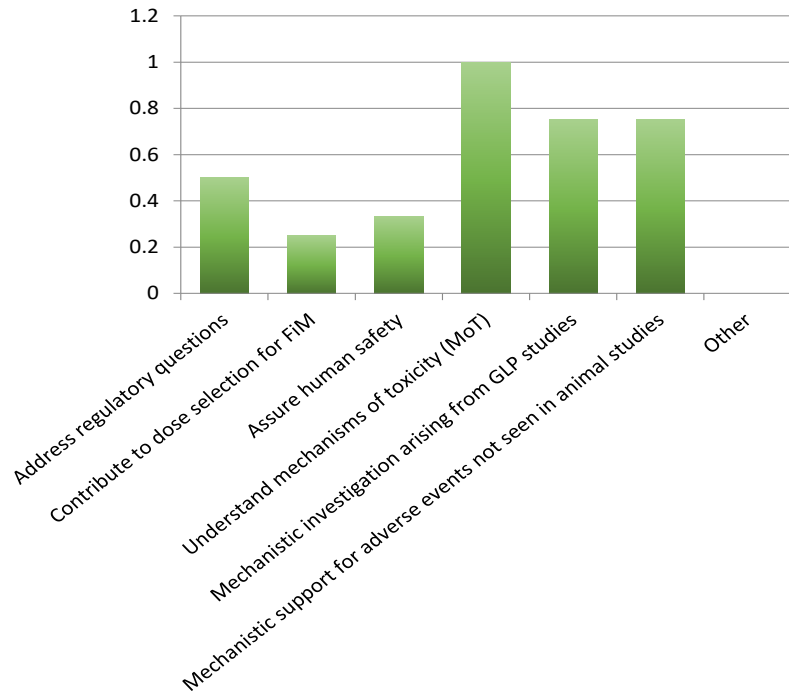

What are the core objectives of your Investigative Toxicology at post-approval stage

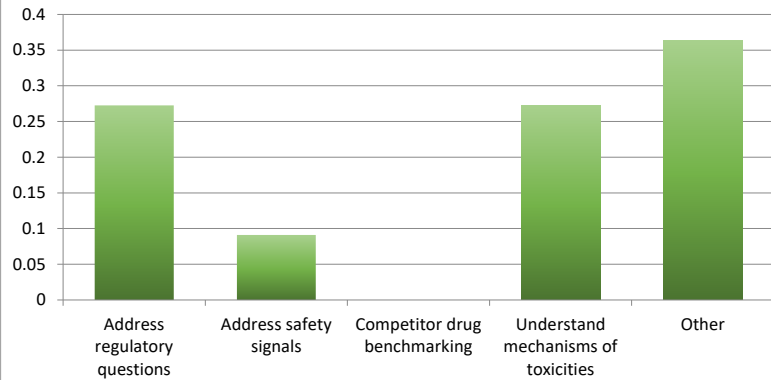

What are the core objectives of your Investigative Toxicology during clinical development

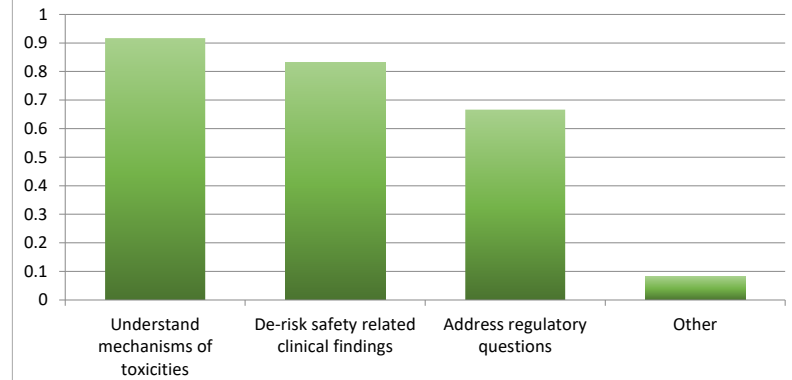

What are the assays in place for the following systems and how are they applied

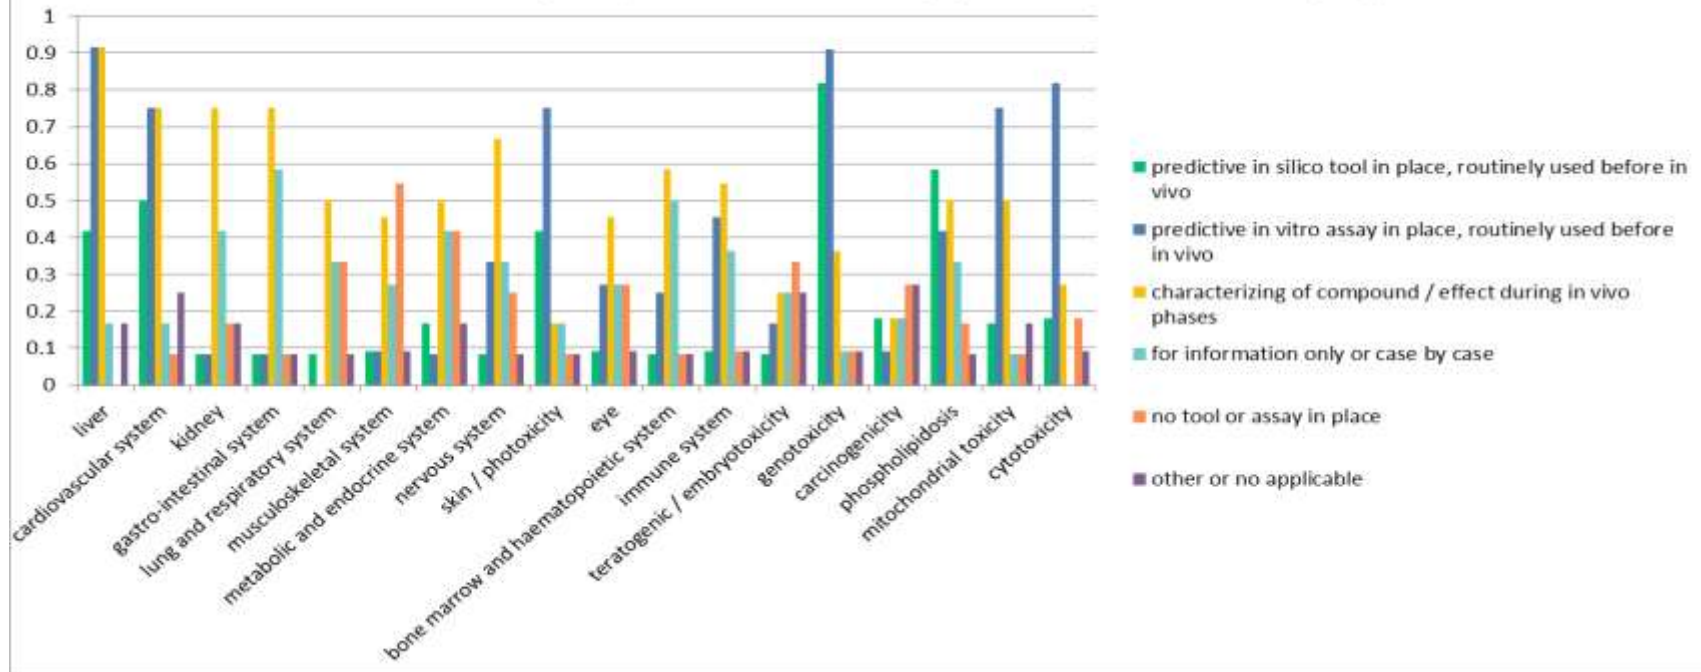

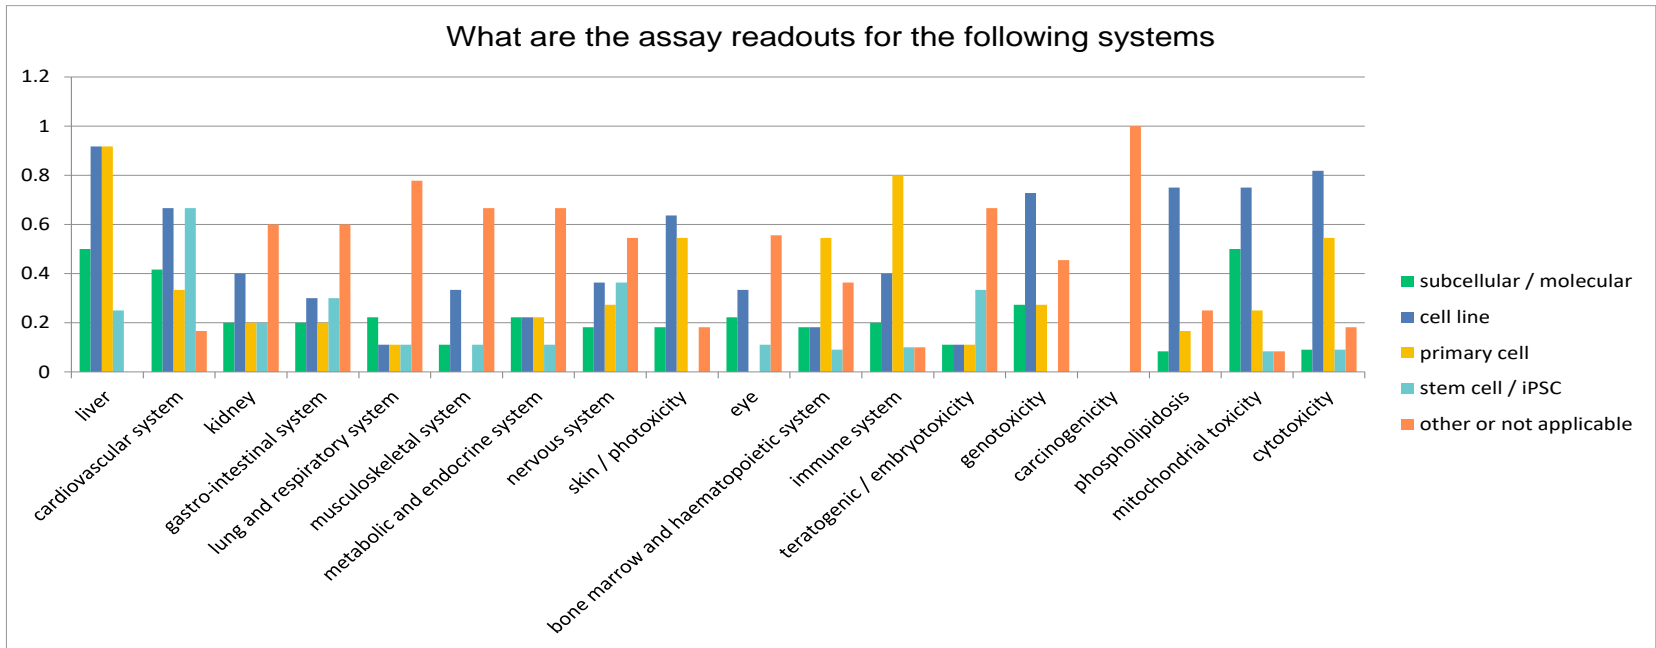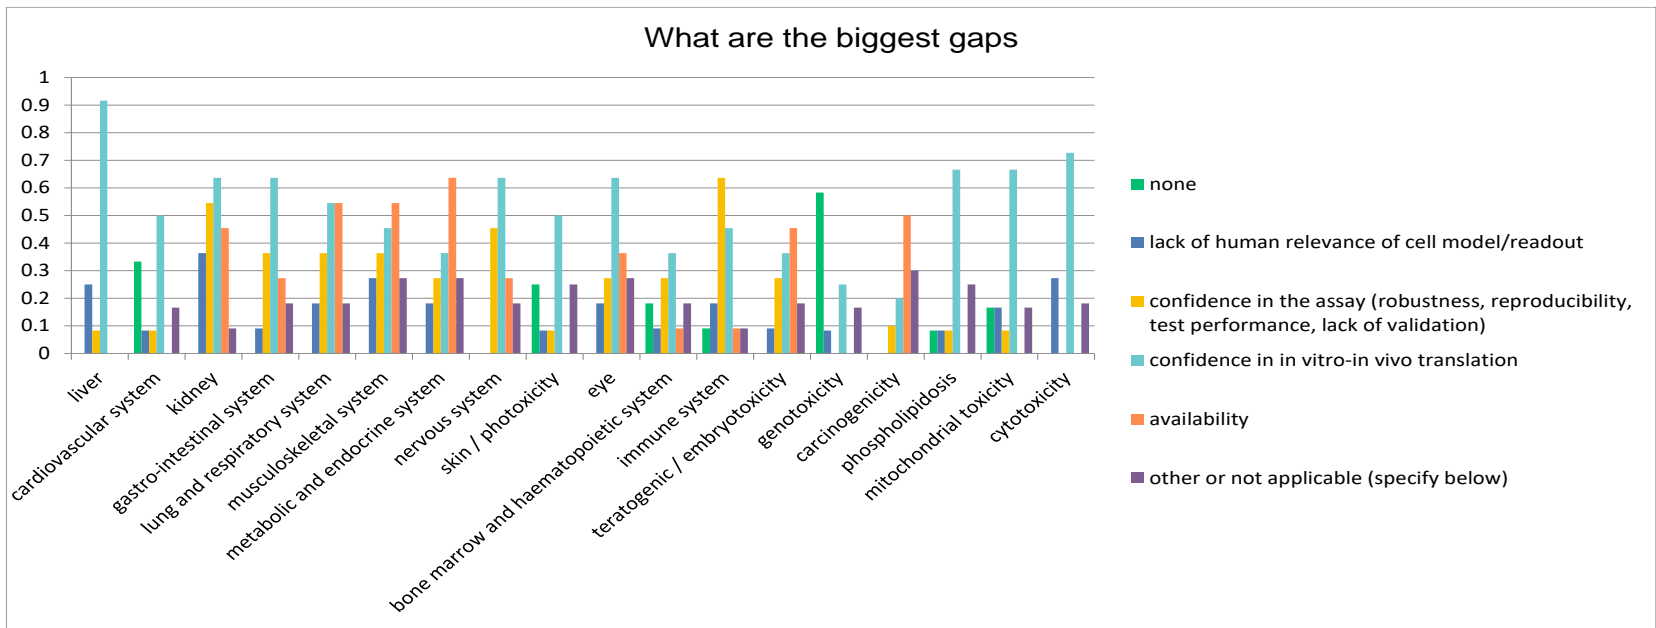



## Which new Technologies do you foresee that may become game changers for Investigative Toxicology

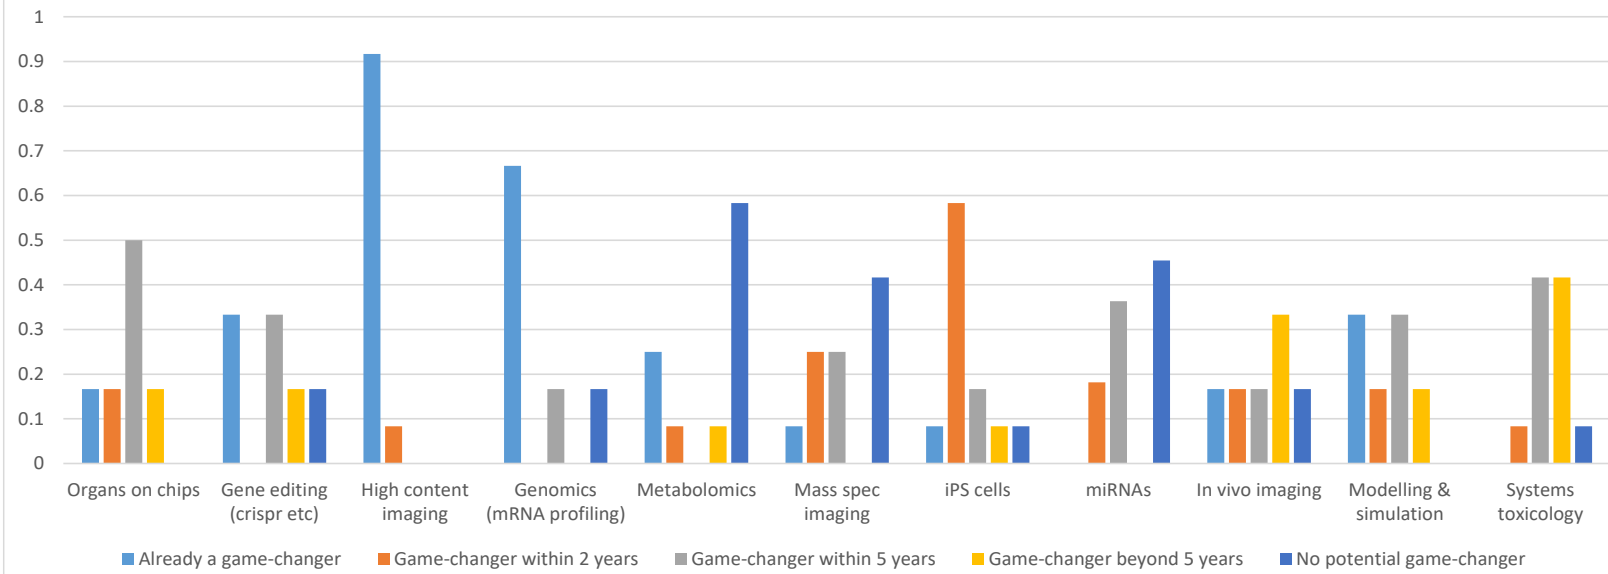

In the field of Investigative Toxicology, how do you see the contribution to and perceived value of...

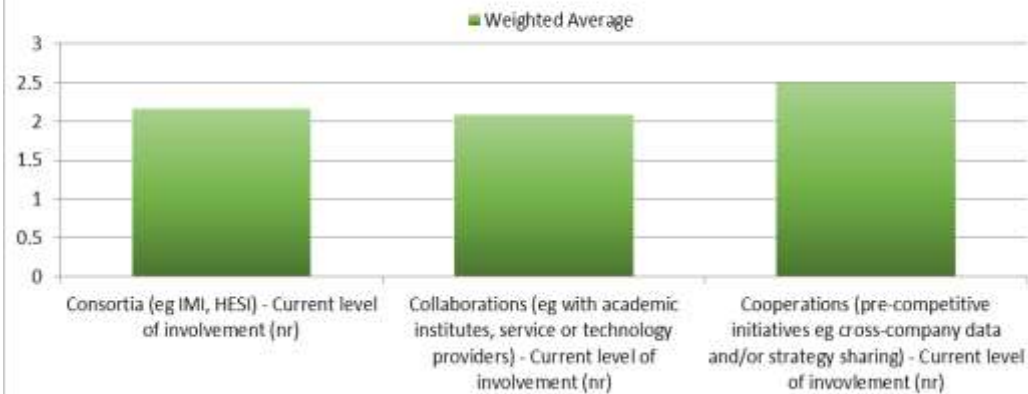

In the field of Investigative Toxicology, what is your current level of involvement in...

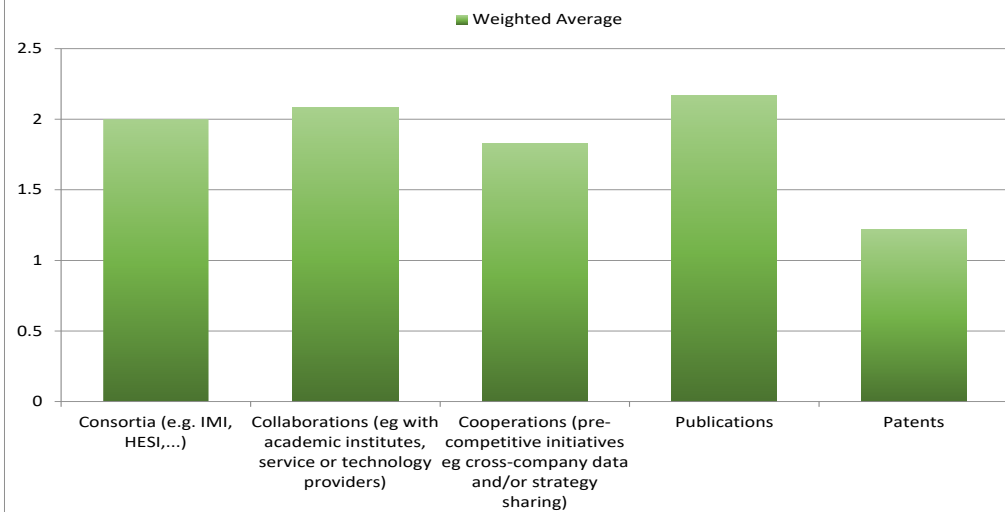

Supplementary Table 1 | Review of in vitro cellular assays available for investigative toxicology

| Organ | Cell lines                                                                                                                                                                                                                                                                                                                                                                                                                                                                                                                                                                                         | Primary cells                                                                                                                                                                                                                                                                                                                                                                                                                                                                                                                                                                                                                                                                                                                                                                                             | iPS                                                                                                                                                                                                                                                                                                                                                                                                                                                                                                                                                                                                                                                                                                      | 3D/organoids                                                                                                                                                                                                                                                                                                                                                                                                                                                                                                                                                                                                                                          | MPS                                                                                                                                                                                                                                                                                                                                                                                                                                                                                                                                                                                                                                                                                                                                                                                                                                                                                      |
|-------|----------------------------------------------------------------------------------------------------------------------------------------------------------------------------------------------------------------------------------------------------------------------------------------------------------------------------------------------------------------------------------------------------------------------------------------------------------------------------------------------------------------------------------------------------------------------------------------------------|-----------------------------------------------------------------------------------------------------------------------------------------------------------------------------------------------------------------------------------------------------------------------------------------------------------------------------------------------------------------------------------------------------------------------------------------------------------------------------------------------------------------------------------------------------------------------------------------------------------------------------------------------------------------------------------------------------------------------------------------------------------------------------------------------------------|----------------------------------------------------------------------------------------------------------------------------------------------------------------------------------------------------------------------------------------------------------------------------------------------------------------------------------------------------------------------------------------------------------------------------------------------------------------------------------------------------------------------------------------------------------------------------------------------------------------------------------------------------------------------------------------------------------|-------------------------------------------------------------------------------------------------------------------------------------------------------------------------------------------------------------------------------------------------------------------------------------------------------------------------------------------------------------------------------------------------------------------------------------------------------------------------------------------------------------------------------------------------------------------------------------------------------------------------------------------------------|------------------------------------------------------------------------------------------------------------------------------------------------------------------------------------------------------------------------------------------------------------------------------------------------------------------------------------------------------------------------------------------------------------------------------------------------------------------------------------------------------------------------------------------------------------------------------------------------------------------------------------------------------------------------------------------------------------------------------------------------------------------------------------------------------------------------------------------------------------------------------------------|
| CV    | <p>Mouse HL-1 cells: atrial phenotype, spontaneously beat following pharmacological stimulation</p> <p>Human AC16: immature electrophysiology possible, not extensively used.</p> <p>Rat myoblast H9c2 cells: skeletal muscle phenotype but unresponsive to electrical stimulation.</p> <p><b>Key strengths:</b> amenable to plate-based assays, cost-efficient</p> <p><b>Key limitations:</b> proliferative, limited cardiomyocyte phenotypes both morphologically and functionally, poor predictive value for cardiotoxicity assessment.</p> <p><b>Refs:</b> <sup>1-3</sup></p>                  | <p>Primary native cardiac cells (cardiomyocytes, fibroblasts, endothelial cells) from different species (rodent, non-rodent human) can be isolated, evaluated and used for testing.</p> <p><b>Key strengths:</b> Physiology similar to <i>in vivo</i> situation; different cell types, degrees of maturation, phenotypes, pathophysiological conditions can be obtained.</p> <p><b>Key limitations:</b> No longer spontaneously beating. Reproducibility between sources of cells. Availability for certain species (e.g. Human). Ethical and 3Rs considerations. Limited compatibility for screening purposes.</p> <p><b>Future opportunities:</b> Improve tissue availability, cells isolation and preservation technique to make them compatible with screening</p> <p><b>Refs:</b> <sup>4,5</sup></p> | <p>Mouse and human stem cell derived cardiomyocytes</p> <p><b>Key strengths:</b> amenable to long term culture and plate-based assays, replicate pharmacological effects, terminally differentiated, respond to electrical stimulation, applicable to screening in early discovery. Biomarker assessment</p> <p><b>Key limitations:</b> immature phenotype in terms of morphology and function (disorganized sarcomeres, incorrect calcium handling, unphysiological electrophysiology), mixed cardiomyocyte populations, expensive.</p> <p><b>Future opportunities:</b> development of patient derived cardiomyocytes mimicking disease or toxic pathophysiology</p> <p><b>Refs:</b> <sup>6,7</sup></p> | <p>Human iPS cardiomyocyte only and multi-cell microtissues</p> <p><b>Key strengths:</b> viable and functional for weeks, pharmacological responses represent intact heart, non-cardiomyocytes able to be integrated, applicable to screening in early discovery, emerging as a predictive model</p> <p><b>Key limitations:</b> physiologically and morphologically immature, bespoke methods required for endpoint assays Lacking neuronal and humoral control</p> <p><b>Future opportunities:</b> simultaneous assessment of cardiac function and structure, incorporation of patient derived iPS cell types</p> <p><b>Refs:</b> <sup>7-9</sup></p> | <p>Human iPSC-based cardiac MPS, incorporating elements of mechanical and electrical loading, non-cardiomyocytes and perfusion systems.</p> <p><b>Key strengths:</b> Maturing morphological and functional phenotype (positive force frequency relationship, physiological resting membrane potential, aligned sarcomeres), incorporation of additional cell types</p> <p><b>Key limitations:</b> pharmacology predictive value largely to be determined, expensive, limited throughput</p> <p><b>Future opportunities:</b> incorporation of larger array of non-cardiomyocytes, pharmacological validation and predictive value to simultaneously assess cardiac function and structure overtime, incorporation of other organ systems e.g. autonomic nervous system and renal control, incorporation of cardiac pre and after load, 3Rs impact</p> <p><b>Refs:</b> <sup>9-12</sup></p> |
| Liver | <p>Human hepatoma cell line Hep G2 is commonly used as a first screen for identification and discarding of toxic compounds and compound series and ranking within chemical series.</p> <p><b>Key strengths:</b> low cost and possibility for high throughput.</p> <p><b>Key limitations:</b> A number of cell-lines have limited functionality, low metabolism, endpoints assess cell health or a specific organelle function, not organ toxicity.</p> <p><b>Future opportunities:</b> HepaRG cell line presently offers a model with hepatocyte functionality and reproducible phenotype e.g.</p> | <p>Animal or human source, most 2D models are applicable for a short-term culture as hepatocyte phenotype is rapidly lost.</p> <p><b>Key strengths:</b> simple, suitable for short-term culture assays for HTS, can test for phenotypic differences and response to compounds metabolism and cytotoxicity's</p> <p><b>Key limitations:</b> Donor-to donor variation, endpoints mainly assess cytotoxicity or specific organelle function and variable quality of primary hepatocytes</p> <p><b>Ref :</b> <sup>17</sup></p>                                                                                                                                                                                                                                                                                | <p>Stem cell derived hepatocyte-like cell (SC-HLC) lines, also commercially available.</p> <p><b>Key limitations:</b> Robust differentiation protocols not yet available and SC-HCLs do not possess human adult hepatocyte phenotype.</p> <p>Adequate benchmarking to physiologically relevant (e.g. freshly isolated hepatocyte) and non-relevant (e.g. HepG2) is lacking.</p> <p><b>Future opportunities:</b> SC-HLCs have potential, when adequately mature to provide a limitless supply of human liver-like cells for HTS and for more</p>                                                                                                                                                          | <p>Microtissue and co-culture models of cell lines and primary human hepatocytes without or with nonparenchymal cells, (incl. liver slices)</p> <p><b>Key strengths:</b> Liver cell polarity and phenotype, in coculture models, tissue/cell functionality can be maintained for several weeks. May offer a model for detection of (some) chronic and inflammation mediated toxicity. Increased sensitivity to liver toxins vs. 2D.</p> <p><b>Key limitations:</b> Higher cost, relatively easy to handle with respect to other models but lower throughput.</p>                                                                                      | <p>Microphysiological <i>in vitro</i> systems in which the physiological and pharmacological characteristics resemble more closely native tissues (30-32).</p> <p><b>Key limitations:</b> Not fully characterised and currently only limited data to suggest improvements in detection and sensitivity compared to 3D/organoids to detect chemical insult on the hepatocyte. At present, systems do not fully integrate the immune functionality vasculature and bile flow and bile collecting ducts.</p> <p><b>Future opportunities:</b> These platforms are intended to represent a significant step</p>                                                                                                                                                                                                                                                                               |

|      |                                                                                                                                                                                                                                                                                                                                                                                                                                                                                                                                                                                                                                                                                                                                                                                                                                                                                                                                                                                                                                                                                                                                                               |                                                                                                                                                                                                                                                                                                                                                                                                                                                                                                       |                                                                                                                                                                                                      |                                                                                                                                                                                                                                                                                                                                                                                                                                                                                                                                                                                                                                                                                                                                                                                                                                                                                                          |                                                                                                                                                                                                                                                                                                                                                                                                                                                                                                                                                                                                                                                                                                                                                                                                                                                            |
|------|---------------------------------------------------------------------------------------------------------------------------------------------------------------------------------------------------------------------------------------------------------------------------------------------------------------------------------------------------------------------------------------------------------------------------------------------------------------------------------------------------------------------------------------------------------------------------------------------------------------------------------------------------------------------------------------------------------------------------------------------------------------------------------------------------------------------------------------------------------------------------------------------------------------------------------------------------------------------------------------------------------------------------------------------------------------------------------------------------------------------------------------------------------------|-------------------------------------------------------------------------------------------------------------------------------------------------------------------------------------------------------------------------------------------------------------------------------------------------------------------------------------------------------------------------------------------------------------------------------------------------------------------------------------------------------|------------------------------------------------------------------------------------------------------------------------------------------------------------------------------------------------------|----------------------------------------------------------------------------------------------------------------------------------------------------------------------------------------------------------------------------------------------------------------------------------------------------------------------------------------------------------------------------------------------------------------------------------------------------------------------------------------------------------------------------------------------------------------------------------------------------------------------------------------------------------------------------------------------------------------------------------------------------------------------------------------------------------------------------------------------------------------------------------------------------------|------------------------------------------------------------------------------------------------------------------------------------------------------------------------------------------------------------------------------------------------------------------------------------------------------------------------------------------------------------------------------------------------------------------------------------------------------------------------------------------------------------------------------------------------------------------------------------------------------------------------------------------------------------------------------------------------------------------------------------------------------------------------------------------------------------------------------------------------------------|
|      | <p>metabolic capacity, bile acid production and transporter proteins for primary screening<br/> <b>Refs:</b> <sup>13 14 15 16</sup></p>                                                                                                                                                                                                                                                                                                                                                                                                                                                                                                                                                                                                                                                                                                                                                                                                                                                                                                                                                                                                                       |                                                                                                                                                                                                                                                                                                                                                                                                                                                                                                       | <p>complex models (3D, co-culture, MPS) with minor batch variability, and to enable to test individual-specific toxicity.<br/> <b>Ref:</b> <sup>18</sup></p>                                         | <p><b>Refs :</b> <sup>19, 14, 20</sup></p>                                                                                                                                                                                                                                                                                                                                                                                                                                                                                                                                                                                                                                                                                                                                                                                                                                                               | <p>forward towards the development of models that faithfully reflect native tissue response to compound toxicities in human. The stability of culture models (organ-on-chip, MPS) may permit more long-term experiments, physiologically, pharmacologically and toxicologically relevant to human liver.<br/> <b>Refs:</b> <sup>21,22</sup></p>                                                                                                                                                                                                                                                                                                                                                                                                                                                                                                            |
| Lung | <p>Alveolar epithelial type II cell (AECII): A549 cell line generated from human adenocarcinoma, exhibiting features of alveolar type II cells.<br/> <b>Key strength:</b> building epithelial layer when cultivated at air-liquid interphase<br/> Bronchoepithelial cell lines: generated by virus-dependant immortalization of normal human bronchial epithelial cells (BEAS-2B cell line, adenovirus) or human tracheal (16HBE14o- cell line, SV40)<br/> <b>Key strength:</b> Formation of tight epithelium or bronchial epithelial morphology allows high throughput testing of epithelium damage<br/> Alveolar macrophage: NR8383 cell line established from Sprague-Dawley rats, maintain a large number of macrophage characteristics of inflammatory response and are widely used as <i>in vitro</i> system to assess cellular response to drug candidates (e.g. phospholipidosis, cytokine release) where inhalation is intended route of delivery<br/> <b>Key strength of all cell lines:</b> Established tools for toxicity testing in high throughput screenings and for mechanistic investigations. Low cost, unlimited source, easy handling</p> | <p>Normal human tracheobronchial epithelial cells or disease biopsy material used in cytotoxicity, function and barrier resistance assays.<br/> Normal human tracheobronchial epithelial cells grown at air-liquid interface can differentiate to form mucocilliary morphology. Have been used <i>in vitro</i> to measure response to xenobiotics. Display CYP2A activity and CYP1A1/1B1 inducibility and activity, relevant for metabolic bioactivation toxicity.<br/> <b>Ref:</b> <sup>26</sup></p> | <p>Several differentiation protocols for producing lung epithelial cells from iPSC have been published. Further optimisation and testing of protocols is required<br/> <b>Ref:</b> <sup>27</sup></p> | <p>3D models of airway epithelium have been developed by cultivating primary airway epithelial cells on porous membranes at the air-liquid interface with the basolateral surface bathed in culture media and the apical side exposed to humidified air, leading to morphologically and functionally differentiated systems: e.g. MucilAir and EpiAirway models<br/> <b>Key strength:</b> Good representation of bronchial epithelium, including cilia function and mucus production. Air exposed 3D cultures allow the toxicity of air borne particles to be studied in a manner that closely mimics inhalation <i>in vivo</i>. Further testing is needed<br/> <b>Key limitations:</b> Limited number of donors for model generation, high costs<br/> <b>Future opportunities:</b> Have potential as integral part of multi-organ chips in microphysiological systems<br/> <b>Ref:</b><sup>28</sup></p> | <p>Lung on a chip models emerged form microphysiological system approaches of several companies. E.g. Wyss Institute, developed a biomimetic microdevice with physiological breathing movements. Proof of principle for mechanistic toxicity and disease testing achieved in collaborations with industry<br/> <b>Key strength:</b> Advancing <i>in vitro</i> models with complex physiologic features (e.g. breathing). Proof of principle for mechanistic toxicity and disease testing achieved in collaborations with industry<br/> <b>Key limitations:</b> Low throughput, laborious handling, control of xenobiotic administration needs further optimization and validation.<br/> <b>Future opportunities:</b> Further advancement of lung chips may have the potential to partly replace animal experiments with<br/> <b>Ref :</b><sup>29</sup></p> |

|        |                                                                                                                                                                                                                                                                                                                                                                                                                                                                                                                                                                                              |                                                                                                                                                                                                                                                                                                                                                                                                                                                                                                                                        |                                                                                                                                                                                                                                                                                                                                                                                              |                                                                                                                                                                                                                                                                                                                                                                          |                                                                                                                                                                                                                                                                                                                                                                                                                                                                                                                                                                                                                                                                                                                                                                                                                                                                                                                                                                                                                                                    |
|--------|----------------------------------------------------------------------------------------------------------------------------------------------------------------------------------------------------------------------------------------------------------------------------------------------------------------------------------------------------------------------------------------------------------------------------------------------------------------------------------------------------------------------------------------------------------------------------------------------|----------------------------------------------------------------------------------------------------------------------------------------------------------------------------------------------------------------------------------------------------------------------------------------------------------------------------------------------------------------------------------------------------------------------------------------------------------------------------------------------------------------------------------------|----------------------------------------------------------------------------------------------------------------------------------------------------------------------------------------------------------------------------------------------------------------------------------------------------------------------------------------------------------------------------------------------|--------------------------------------------------------------------------------------------------------------------------------------------------------------------------------------------------------------------------------------------------------------------------------------------------------------------------------------------------------------------------|----------------------------------------------------------------------------------------------------------------------------------------------------------------------------------------------------------------------------------------------------------------------------------------------------------------------------------------------------------------------------------------------------------------------------------------------------------------------------------------------------------------------------------------------------------------------------------------------------------------------------------------------------------------------------------------------------------------------------------------------------------------------------------------------------------------------------------------------------------------------------------------------------------------------------------------------------------------------------------------------------------------------------------------------------|
|        | <p><b>Key limitation of all cell lines:</b><br/>General genomic issues with cancer cell lines or genetic transformation, less lung cell features compared to primary cells<br/><b>Refs:</b> 23-25</p>                                                                                                                                                                                                                                                                                                                                                                                        |                                                                                                                                                                                                                                                                                                                                                                                                                                                                                                                                        |                                                                                                                                                                                                                                                                                                                                                                                              |                                                                                                                                                                                                                                                                                                                                                                          |                                                                                                                                                                                                                                                                                                                                                                                                                                                                                                                                                                                                                                                                                                                                                                                                                                                                                                                                                                                                                                                    |
| Kidney | <p>Established kidney cell lines (e.g. HEK293) not broadly used for safety assessment. As drug-induced AEs in kidney mostly affect tubulus, focus is on cell models representing renal cortex. Relevant cellular models include e.g. TERT immortalized proximal tubular cells (RPTEC-TERT1).<br/><b>Key strength:</b><br/>Immortalized cell lines expressing kidney transporters are used to support mechanistic understanding of toxicity<br/><b>Key limitations:</b> Not able to model the complexity of kidney physiology, some key transporters are not expressed<br/><b>Ref:</b> 30</p> | <p>Primary cells from kidney available (PTEC, podocytes, mesangial cells). Most established in drug safety are primary proximal tubular cells which can be obtained from various resources and cultured under standard conditions.<br/><b>Key strength:</b> human origin applied for mechanistic understanding using human biomarkers<br/><b>Key limitations:</b> Limited phenotypic stability. Source of human material limited, inter-individual differences may influence results, difficult preparation<br/><b>Refs:</b> 31,32</p> | <p>iPS-derived kidney cells have been reported and show promising predictivity to detected drug-induced nephrotoxicity. Further validation ongoing<br/><b>Key Strength:</b> Proximal tubular like iPSC have demonstrated 87% accuracy in detecting nephrotoxicity, can be used to build 3D Models<br/><b>Key limitations:</b> Differentiation Protocols often complex<br/><b>Ref:</b> 33</p> | <p>Area is in its infancy, mainly used for pharmacological investigations but there are promising approaches for 3d cultured kidney cells<br/><b>Key limitations:</b> so far very limited applications for toxicological application published<br/><b>Future opportunities:</b><br/>Organoids that may capture complex architecture of Kidney<br/><b>Refs:</b> 34,35</p> | <p>Several groups working on developing microphysiological, organ on a chip like models recapitulating kidney. Mostly focusing on proximal tubular cells and proper architecture. Bioprinting has been used to create 3D human renal proximal tubules <i>in vitro</i> embedded within an extracellular matrix and housed in perfusable tissue chips, maintained for greater than two months.<br/><b>Key strength:</b> the presence of fluid shear stress makes cells more sensitive to the drugs, and the use of primary cells makes the <i>in vitro</i> renal toxicity testing more physiologically relevant.<br/><b>Key limitations:</b> However, high-throughput screening on the kidney chip platform has not yet been achieved. Besides, nephrotoxicity induced by drug metabolites can hardly be studied directly by kidney-on-a-chip.<br/><b>Future opportunities:</b><br/>Hyphenation of other organ chips, especially liver chips, is desirable for in-depth study of nephrotoxicity of novel drug candidates.<br/><b>Refs:</b> 36,37</p> |
| CNS    | <p>Neuronally differentiated mouse embryonal carcinoma P19 neurons human neuroblastoma SH-SY5Y cells and rat adrenal pheochromocytoma PC12 cells have been used for CNS toxicity assessment. Cytotoxicity, intracellular esterase activity, neurite outgrowth and mitochondrial function endpoints have been used. The importance of including</p>                                                                                                                                                                                                                                           | <p>Simple and rapid multiwell microelectrode array (MEA) technology has been used for the simultaneous determination of test compound effects on spontaneous electrical activity and cell health from networks of primary rat cortical neurones. The mixed neuronal culture consisted of glutamatergic and GABAergic neurons and glia. The neurons contained both</p>                                                                                                                                                                  | <p><i>In vitro</i> neurotoxicity in a human system based on two different types of human iPSC-derived cells and MEA technology have been described. iPSC-derived peripheral neurons exhibited burst-like activity on MEA chips, consistent with a functional neuronal network. Proof of concept studies indicated sensitivity to neurotoxic drugs</p>                                        | <p>Given the importance of cell-to-cell interactions in the brain, laboratories have begun to develop brain cell culture models. Extracellular matrix scaffolds seeded with primary cortical neurons have also been assessed and human iPSCs differentiated into neural progenitor cells and neuronal astroglia lineages and cultured in 3D aggregates have shown</p>    | <p>Brain is perhaps the most complex organ and therefore nervous systems on chip must reflect this complex organisation, multicellular interactions, blood brain barrier compartment and possibly a connection to peripheral and spinal cord MPS. Such system must also be amenable to high content imaging endpoints. Recent advances demonstrate</p>                                                                                                                                                                                                                                                                                                                                                                                                                                                                                                                                                                                                                                                                                             |

|    |                                                                                                                                                                                                                                                                                                                                                                                                                                                                                                                                                                                                                                                                                                                                                                          |                                                                                                                                                                                                                                                                                                                                                                                                                                                                                                                                                                                                                                                                        |                                                                                                                                                                                                                                                                                                                                                                  |                                                                                                                                                                                                                                                                                                                                  |                                                                                                                                                                                                                                                                                                                                                                                                                                                                                                                                                                                                                                                                                                                                                 |
|----|--------------------------------------------------------------------------------------------------------------------------------------------------------------------------------------------------------------------------------------------------------------------------------------------------------------------------------------------------------------------------------------------------------------------------------------------------------------------------------------------------------------------------------------------------------------------------------------------------------------------------------------------------------------------------------------------------------------------------------------------------------------------------|------------------------------------------------------------------------------------------------------------------------------------------------------------------------------------------------------------------------------------------------------------------------------------------------------------------------------------------------------------------------------------------------------------------------------------------------------------------------------------------------------------------------------------------------------------------------------------------------------------------------------------------------------------------------|------------------------------------------------------------------------------------------------------------------------------------------------------------------------------------------------------------------------------------------------------------------------------------------------------------------------------------------------------------------|----------------------------------------------------------------------------------------------------------------------------------------------------------------------------------------------------------------------------------------------------------------------------------------------------------------------------------|-------------------------------------------------------------------------------------------------------------------------------------------------------------------------------------------------------------------------------------------------------------------------------------------------------------------------------------------------------------------------------------------------------------------------------------------------------------------------------------------------------------------------------------------------------------------------------------------------------------------------------------------------------------------------------------------------------------------------------------------------|
|    | <p>astrocytes when predicting acute toxic potential using a neuronal screening has been highlighted by work with pure neuronal (NT2.N) and astrocytic (NT2.A) and integrated neuronal/ astrocytic (NT2.N/A) cell systems derived from the human NT2.D1 cell line.</p> <p><b>Key strengths:</b> low cost, possibility to high throughput, relative constancy of the lines</p> <p><b>Key limitations:</b> Cell lines have limited functionality, proliferate unlike neurons.</p> <p><b>Refs:</b> <sup>38,39</sup></p>                                                                                                                                                                                                                                                      | <p>axons and dendrites and form synapses. The assay measured spontaneous action potential “spikes” and groups of spikes, or bursts.</p> <p><b>Key strengths:</b> Supposedly closer to brain or peripheral cells than cell lines, may express tissue receptors, channels and functions.</p> <p><b>Key limitations:</b> Difficult to acquire, expensive, lack of reproducibility.</p> <p><b>Ref:</b> <sup>40</sup></p>                                                                                                                                                                                                                                                   | <p>and drugs associated with seizure-liability</p> <p><b>Key strengths:</b> Reproducible, easy access, relatively cheap once established. A compromise between primary cells and cell lines. Can be induced in various NS types, e.g., neurons, glia, astrocytes.</p> <p><b>Key limitations:</b> Remain embryonic in nature</p> <p><b>Ref:</b> <sup>41</sup></p> | <p>promise. Biological and disease characterisations indicate promise.</p> <p><b>Key strengths:</b> Enhances inter-neuronal connections, but also a proper 3D interaction with glial compartments.</p> <p><b>Key limitations:</b> Long to establish, difficult to maintain, low throughput</p> <p><b>Refs:</b> <sup>42</sup></p> | <p>the feasibility of such complex system for diseases and toxicology studies.</p> <p><b>Key strengths:</b> Fluidics for proper BBB simulation, possible to study interactions with other MPS, immune compartment possible.</p> <p><b>Key limitations:</b> Long to establish, difficult to maintain, complex endpoints, low throughput</p> <p><b>Ref:</b> <sup>43</sup></p>                                                                                                                                                                                                                                                                                                                                                                     |
| GI | <p>Caco-2 derived from colorectal adenocarcinoma has been the standard cell line used <i>in vitro</i> for GI function and drug absorption.</p> <p><b>Key strengths:</b> Low cost, possibility to high throughput, relative constancy of the lines. Caco2, HT29, T84 cells in investigations of the transport and antioxidant/anti-inflammatory potential. For example, HT29 cell lines mimics both enterocytes and goblet cells</p> <p><b>Key limitations:</b> limited functionality – lack of mucus layer or the interactions between the epithelium and the stroma. Prolonged culture time before use (i.e. 3 weeks for Caco-2)</p> <p><b>Future opportunities:</b> Improved physiological function in novel microfluidic devices</p> <p><b>Ref:</b> <sup>44</sup></p> | <p>Tissue-derived intestinal epithelial cell cultures support of cytotoxicity, absorption, metabolism. Primary stem cells (SC) are utilized for organoid cultures. Cross-species organoids have been described. A reproducible protocol for maintaining long term primary cell cultures from intestinal tissue is a challenge (Lukovac and Roeselers, 2015)</p> <p><b>Key strengths:</b> SC can differentiate into all intestinal epithelial cells (including also stem and progenitor cells). Cross-species comparisons a reality</p> <p><b>Future opportunities:</b> Inclusion of SC-derived organoids in microfluidics devices</p> <p><b>Ref:</b> <sup>45</sup></p> | <p>iPSC can be directly differentiated into intestinal-like tissue <i>in vitro</i>. Limited data due to success of primary SC application. Knock-out lines being developed (also Caco-2 KO lines)</p> <p><b>Key strengths:</b> Availability and sustainability of lines. Reproducible and relatively cheap.</p> <p><b>Ref:</b> <sup>46</sup></p>                 | <p>3D organoids and multicellular microtissue enable functional comparison across species, GI regions, and healthy versus disease.</p> <p><b>Key strengths:</b> Multi-cellular systems in 3D, allows connection and communication between cells</p> <p><b>Refs:</b> <sup>44,47</sup></p>                                         | <p>Gut-on-chip models offer potential for pulsatile flow, peristaltic stretch, co-culture with inflammatory cell and/or commensal microbes, and activation of sensory neurons. Significant potential, but very early stages of assessment.</p> <p><b>Key strengths:</b> Intestinal models are very well suited for microfluidic organ-on-a-chip systems.</p> <p><b>Key Limitations:</b> Low throughput and time required to establish models</p> <p><b>Future opportunities:</b> Connecting the different areas of the intestine in one “chip”, including engineering in peristalsis and vascularization. Better understand the role of microbiota-derived molecules in modulating the intestines response</p> <p><b>Ref:</b> <sup>48</sup></p> |

- 1 Claycomb, W. C. *et al.* HL-1 cells: A cardiac muscle cell line that contracts and retains phenotypic characteristics of the adult cardiomyocyte. *P Natl Acad Sci USA* **95**, 2979-2984, doi:DOI 10.1073/pnas.95.6.2979 (1998).
- 2 Davidson, M. M. *et al.* Novel cell lines derived from adult human ventricular cardiomyocytes. *J Mol Cell Cardiol* **39**, 133-147, doi:10.1016/j.yjmcc.2005.03.003 (2005).
- 3 Watkins, S. J., Borthwick, G. M. & Arthur, H. M. The H9C2 cell line and primary neonatal cardiomyocyte cells show similar hypertrophic responses in vitro. *In Vitro Cell Dev-An* **47**, 125-131, doi:10.1007/s11626-010-9368-1 (2011).
- 4 Hall, C., Gehmlich, K., Denning, C. & Pavlovic, D. Complex Relationship Between Cardiac Fibroblasts and Cardiomyocytes in Health and Disease. *J Am Heart Assoc* **10**, doi:ARTN e01933810.1161/JAHA.120.019338 (2021).
- 5 Abi-Gerges, N. *et al.* Multiparametric Mechanistic Profiling of Inotropic Drugs in Adult Human Primary Cardiomyocytes. *Sci Rep-Uk* **10**, doi:ARTN 7692 10.1038/s41598-020-64657-2 (2020).
- 6 Casini, S., Verkerk, A. O. & Remme, C. A. Human iPSC-Derived Cardiomyocytes for Investigation of Disease Mechanisms and Therapeutic Strategies in Inherited Arrhythmia Syndromes: Strengths and Limitations. *Cardiovasc Drug Ther* **31**, 325-344, doi:10.1007/s10557-017-6735-0 (2017).
- 7 Sacchetto, C., Vitiello, L., de Windt, L. J., Rampazzo, A. & Calore, M. Modeling Cardiovascular Diseases with hiPSC-Derived Cardiomyocytes in 2D and 3D Cultures. *International Journal of Molecular Sciences* **21**, doi:ARTN 340410.3390/ijms21093404 (2020).
- 8 Qu, Y. S. *et al.* Inotropic assessment in engineered 3D cardiac tissues using human induced pluripotent stem cell-derived cardiomyocytes in the Biowire (TM) II platform. *J Pharmacol Tox Met* **105**, doi:ARTN 106886 10.1016/j.vascn.2020.106886 (2020).
- 9 Truskey, G. A. Human Microphysiological Systems and Organoids as in Vitro Models for Toxicological Studies. *Front Public Health* **6**, doi:ARTN 185 10.3389/fpubh.2018.00185 (2018).
- 10 Mathur, A. *et al.* Human iPSC-based Cardiac Microphysiological System For Drug Screening Applications. *Sci Rep-Uk* **5**, doi:ARTN 8883 10.1038/srep08883 (2015).
- 11 Kurokawa, Y. K. & George, S. C. Tissue engineering the cardiac microenvironment: Multicellular microphysiological systems for drug screening. *Advanced drug delivery reviews* **96**, 225-233, doi:10.1016/j.addr.2015.07.004 (2016).
- 12 Pointon, A. *et al.* Cardiovascular microphysiological systems (CVMPs) for safety studies - a pharma perspective. *Lab on a Chip* **21**, 458-472, doi:10.1039/d0lc01040e (2021).
- 13 McGill, M. R. *et al.* HepaRG cells: a human model to study mechanisms of acetaminophen hepatotoxicity. *Hepatology* **53**, 974-982, doi:10.1002/hep.24132 (2011).
- 14 Bell, C. C. *et al.* Transcriptional, Functional, and Mechanistic Comparisons of Stem Cell-Derived Hepatocytes, HepaRG Cells, and Three-Dimensional Human Hepatocyte Spheroids as Predictive In Vitro Systems for Drug-Induced Liver Injury. *Drug Metab Dispos* **45**, 419-429, doi:10.1124/dmd.116.074369 (2017).
- 15 Bell, C. C. *et al.* Transcriptional, Functional, and Mechanistic Comparisons of Stem Cell-Derived Hepatocytes, HepaRG Cells, and Three-Dimensional Human Hepatocyte Spheroids as Predictive In Vitro Systems for Drug-Induced Liver Injury. *Drug Metabolism and Disposition* **45**, 419-429, doi:10.1124/dmd.116.074369 (2017).
- 16 Gomez-Lechon, M. J., Tolosa, L., Conde, I. & Donato, M. T. Competency of different cell models to predict human hepatotoxic drugs. *Expert Opin Drug Metab Toxicol* **10**, 1553-1568, doi:10.1517/17425255.2014.967680 (2014).
- 17 Bell, C. C. *et al.* Comparison of Hepatic 2D Sandwich Cultures and 3D Spheroids for Long-term Toxicity Applications: A Multicenter Study. *Toxicol Sci* **162**, 655-666, doi:10.1093/toxsci/kfx289 (2018).
- 18 Bell, C. C. *et al.* Characterization of primary human hepatocyte spheroids as a model system for drug-induced liver injury, liver function and disease. *Sci Rep-Uk* **6**, doi:ARTN 25187 10.1038/srep25187 (2016).
- 19 Gunness, P. *et al.* 3D organotypic cultures of human HepaRG cells: a tool for in vitro toxicity studies. *Toxicol Sci* **133**, 67-78, doi:10.1093/toxsci/kft021 (2013).

- 20 Lauschke, V. M., Hendriks, D. F., Bell, C. C., Andersson, T. B. & Ingelman-Sundberg, M. Novel 3D Culture Systems for Studies of Human Liver Function and Assessments of the Hepatotoxicity of Drugs and Drug Candidates. *Chem Res Toxicol* **29**, 1936-1955, doi:10.1021/acs.chemrestox.6b00150 (2016).
- 21 Godoy, P. *et al.* Recent advances in 2D and 3D in vitro systems using primary hepatocytes, alternative hepatocyte sources and non-parenchymal liver cells and their use in investigating mechanisms of hepatotoxicity, cell signaling and ADME. *Arch Toxicol* **87**, 1315-1530, doi:10.1007/s00204-013-1078-5 (2013).
- 22 Foster, A. J. *et al.* Integrated in vitro models for hepatic safety and metabolism: evaluation of a human Liver-Chip and liver spheroid. *Arch Toxicol* **93**, 1021-1037, doi:10.1007/s00204-019-02427-4 (2019).
- 23 Wu, J. *et al.* Characterization of air-liquid interface culture of A549 alveolar epithelial cells. *Braz J Med Biol Res* **51**, e6950, doi:10.1590/1414-431X20176950 (2017).
- 24 Helmke, R. J., Boyd, R. L., German, V. F. & Mangos, J. A. From growth factor dependence to growth factor responsiveness: the genesis of an alveolar macrophage cell line. *In Vitro Cell Dev Biol* **23**, 567-574, doi:10.1007/BF02620974 (1987).
- 25 Rothen-Rutishauser, B., Clift, M. J. D., Jud, C., Kink, A. & Wick, P. Human epithelial cells in vitro – Are they an advantageous tool to help understand the nanomaterial-biological barrier interaction? *Euro Nanotox Letters* **4**, 1-20 (2012).
- 26 Kim, S. W. *et al.* Proteomics-based identification of proteins secreted in apical surface fluid of squamous metaplastic human tracheobronchial epithelial cells cultured by three-dimensional organotypic air-liquid interface method. *Cancer Res* **67**, 6565-6573, doi:10.1158/0008-5472.CAN-06-2783 (2007).
- 27 McCauley, K. B. *et al.* Efficient Derivation of Functional Human Airway Epithelium from Pluripotent Stem Cells via Temporal Regulation of Wnt Signaling. *Cell Stem Cell* **20**, 844-857 e846, doi:10.1016/j.stem.2017.03.001 (2017).
- 28 Balogh Sivars, K. *et al.* A 3D Human Airway Model Enables Prediction of Respiratory Toxicity of Inhaled Drugs In Vitro. *Toxicol Sci* **162**, 301-308, doi:10.1093/toxsci/kfx255 (2018).
- 29 Benam, K. H. *et al.* Small airway-on-a-chip enables analysis of human lung inflammation and drug responses in vitro. *Nat Methods* **13**, 151-157, doi:10.1038/nmeth.3697 (2016).
- 30 Aschauer, L. *et al.* Application of RPTEC/TERT1 cells for investigation of repeat dose nephrotoxicity: A transcriptomic study. *Toxicol In Vitro* **30**, 106-116, doi:10.1016/j.tiv.2014.10.005 (2015).
- 31 Moisan, A. *et al.* Inhibition of EGF Uptake by Nephrotoxic Antisense Drugs In Vitro and Implications for Preclinical Safety Profiling. *Mol Ther Nucleic Acids* **6**, 89-105, doi:10.1016/j.omtn.2016.11.006 (2017).
- 32 Bajaj, P. *et al.* Freshly isolated primary human proximal tubule cells as an in vitro model for the detection of renal tubular toxicity. *Toxicology* **442**, 152535, doi:10.1016/j.tox.2020.152535 (2020).
- 33 Kandasamy, K. *et al.* Prediction of drug-induced nephrotoxicity and injury mechanisms with human induced pluripotent stem cell-derived cells and machine learning methods. *Sci Rep* **5**, 12337, doi:10.1038/srep12337 (2015).
- 34 Kim, Y. K., Nam, S. A. & Yang, C. W. Applications of kidney organoids derived from human pluripotent stem cells. *Korean J Intern Med* **33**, 649-659, doi:10.3904/kjim.2018.198 (2018).
- 35 Yousef Yengej, F. A., Jansen, J., Rookmaaker, M. B., Verhaar, M. C. & Clevers, H. Kidney Organoids and Tubuloids. *Cells* **9**, doi:10.3390/cells9061326 (2020).
- 36 Vormann, M. K. *et al.* Nephrotoxicity and Kidney Transport Assessment on 3D Perfused Proximal Tubules. *AAPS J* **20**, 90, doi:10.1208/s12248-018-0248-z (2018).
- 37 Bajaj, P., Chowdhury, S. K., Yucha, R., Kelly, E. J. & Xiao, G. Emerging Kidney Models to Investigate Metabolism, Transport, and Toxicity of Drugs and Xenobiotics. *Drug Metab Dispos* **46**, 1692-1702, doi:10.1124/dmd.118.082958 (2018).
- 38 Popova, D., Karlsson, J. & Jacobsson, S. O. P. Comparison of neurons derived from mouse P19, rat PC12 and human SH-SY5Y cells in the assessment of chemical- and toxin-induced neurotoxicity. *BMC Pharmacol Toxicol* **18**, 42, doi:10.1186/s40360-017-0151-8 (2017).
- 39 Woehrling, E. K., Hill, E. J. & Coleman, M. D. Evaluation of the Importance of Astrocytes When Screening for Acute Toxicity in Neuronal Cell Systems. *Neurotox Res* **17**, 103-113, doi:10.1007/s12640-009-9084-3 (2010).



- 40 Wallace, K., Strickland, J. D., Valdivia, P., Mundy, W. R. & Shafer, T. J. A multiplexed assay for determination of neurotoxicant effects on  
spontaneous network activity and viability from microelectrode arrays. *Neurotoxicology* **49**, 79-85, doi:10.1016/j.neuro.2015.05.007 (2015).
- 41 Tukker, A. M., Wijnolts, F. M. J., de Groot, A. & Westerink, R. H. S. Human iPSC-derived neuronal models for in vitro neurotoxicity  
assessment. *Neurotoxicology* **67**, 215-225, doi:10.1016/j.neuro.2018.06.007 (2018).
- 42 Bordoni, M. *et al.* From Neuronal Differentiation of iPSCs to 3D Neuro-Organoids: Modelling and Therapy of Neurodegenerative Diseases.  
*Int J Mol Sci* **19**, doi:10.3390/ijms19123972 (2018).
- 43 Bang, S., Jeong, S., Choi, N. & Kim, H. N. Brain-on-a-chip: A history of development and future perspective. *Biomicrofluidics* **13**, doi:Artn  
051301 10.1063/1.5120555 (2019).
- 44 Costa, J. & Ahluwalia, A. Advances and Current Challenges in Intestinal in vitro Model Engineering: A Digest. *Front Bioeng Biotechnol* **7**,  
144, doi:10.3389/fbioe.2019.00144 (2019).
- 45 Barker, N. *et al.* Identification of stem cells in small intestine and colon by marker gene Lgr5. *Nature* **449**, 1003-1007,  
doi:10.1038/nature06196 (2007).
- 46 Munera, J. O. & Wells, J. M. Generation of Gastrointestinal Organoids from Human Pluripotent Stem Cells. *Methods Mol Biol* **1597**, 167-  
177, doi:10.1007/978-1-4939-6949-4\_12 (2017).
- 47 Freire, R. *et al.* Human gut derived-organoids provide model to study gluten response and effects of microbiota-derived molecules in  
celiac disease. *Sci Rep* **9**, 7029, doi:10.1038/s41598-019-43426-w (2019).
- 48 Bein, A. *et al.* Microfluidic Organ-on-a-Chip Models of Human Intestine. *Cell Mol Gastroenter* **5**, 659-668, doi:10.1016/j.jcmgh.2017.12.010  
(2018).
